# Supplementary material for: A Model Intercomparison of CCN-Limited Tenuous Clouds in the High Arctic
Source: Copernicus journal article supplement (doi:10.5194/acp-2017-1128), 2017-12-11
Supplement: Supplementary file 1 [file acp-2017-1128-supplement.pdf]

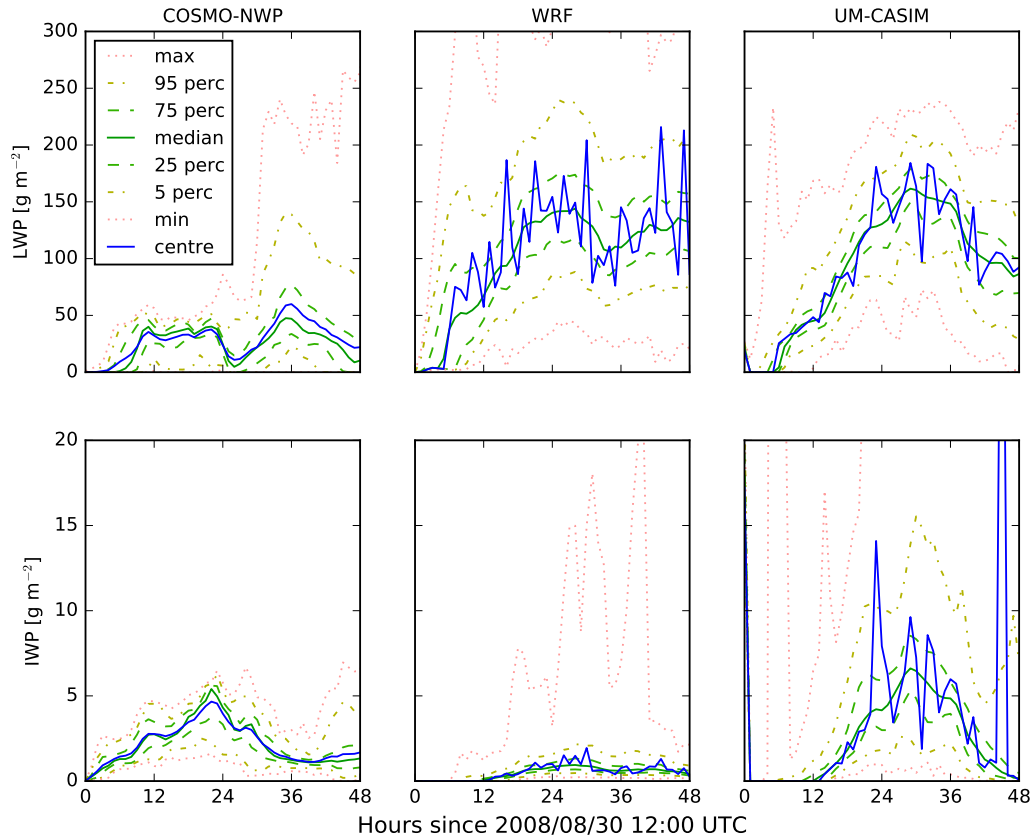

**Figure S1.** Time-varying distributions of liquid water paths and ice water paths from COSMO-NWP, WRF, and UM-CASIM for the case with a prescribed CDNC of  $30 \text{ cm}^{-3}$  and ICNC of  $0.2 \text{ L}^{-1}$  (CDNC30\_ICNC0p20). All values are shown for a  $100 \text{ km}^2$  area centred at the centre of the domain. Red dotted lines give the area maximum and minimum values, orange dash-dotted lines give the 95<sup>th</sup> and 5<sup>th</sup> percentile values, green dashed lines give the 75<sup>th</sup> and 25<sup>th</sup> percentile values, green solid lines give the median values, and blue solid lines give the centre-of-domain values.

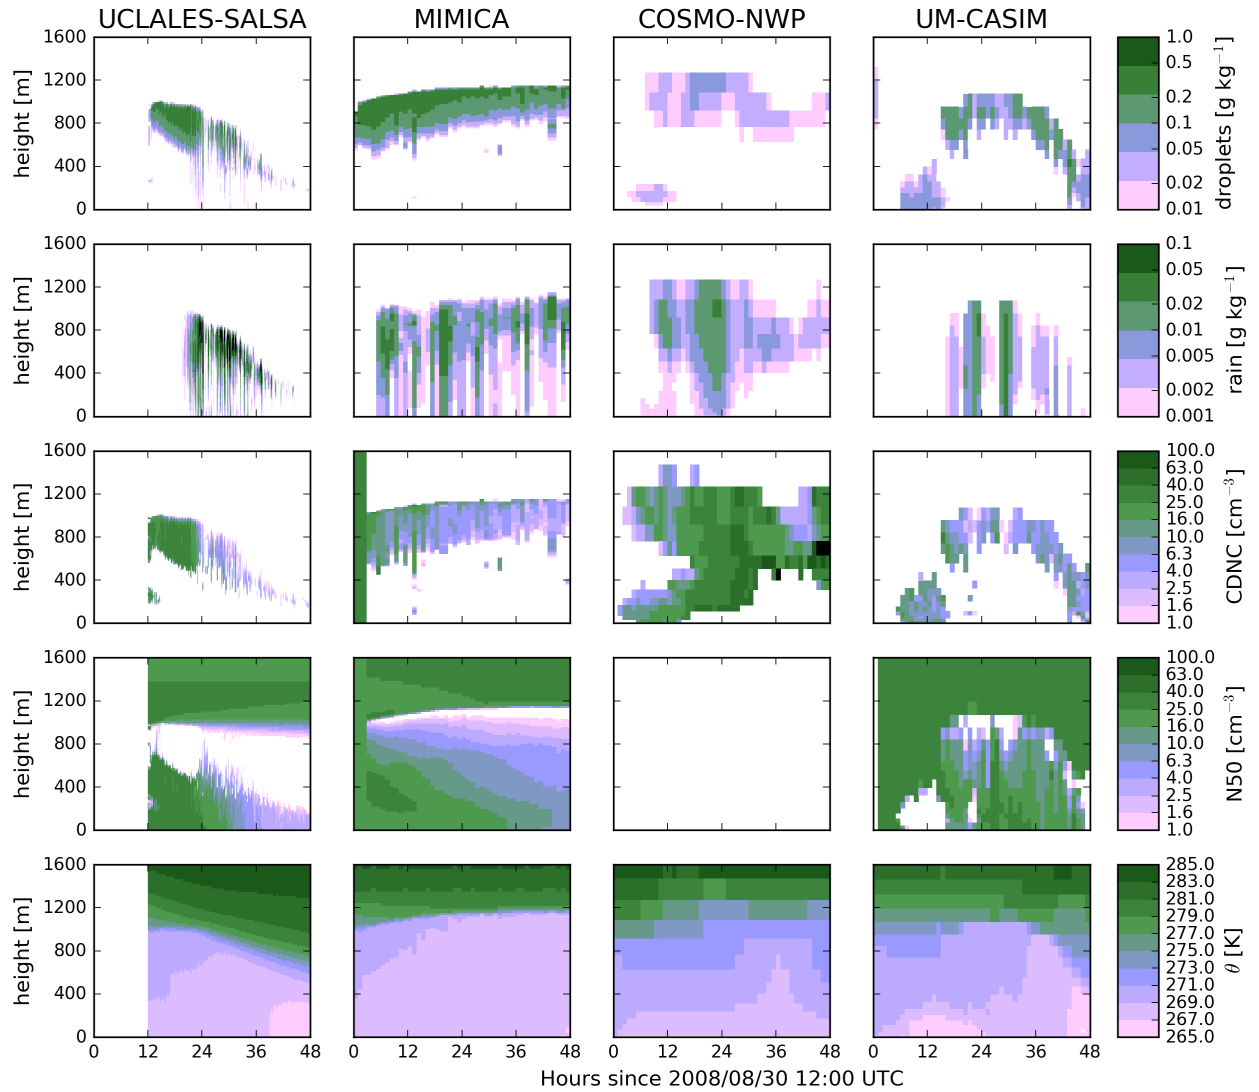

**Figure S2.** Cloud properties in the simulations with prognostic aerosol and an initial CCN concentration of  $30 \text{ cm}^{-3}$  (CCN80prog\_noise). Top row: cloud droplet mass mixing ratio, second row: rain mass mixing ratio, third row: cloud droplet number concentration, fourth row: N50 concentration, bottom row: potential temperature. Results are shown from the (from left to right) UCLALES-SALSA, MIMICA, and UM-CASIM models. Note that aerosol concentrations and CDNCs are fixed during the two-hour spin-up period in MIMICA, and N50 concentrations are not available for COSMO-NWP.
